# Supplementary material for: Biogenic Punica granatum Flower Extract Assisted ZnFe2O4 and ZnFe2O4-Cu Composites for Excellent Photocatalytic Degradation of RhB Dye
Source: MDPI journal article supplement (doi:10.3390/toxics12010077), 2024-01-16
Supplement: s1 [file s1]

# Supplementary Materials: Biogenic *Punica granatum* Flower Extract Assisted $\text{ZnFe}_2\text{O}_4$ and $\text{ZnFe}_2\text{O}_4\text{-Cu}$ Composites for Excellent Photocatalytic Degradation of RhB Dye

Amal Alshehri, Laila Alharbi and Maqsood Ahmad Malik

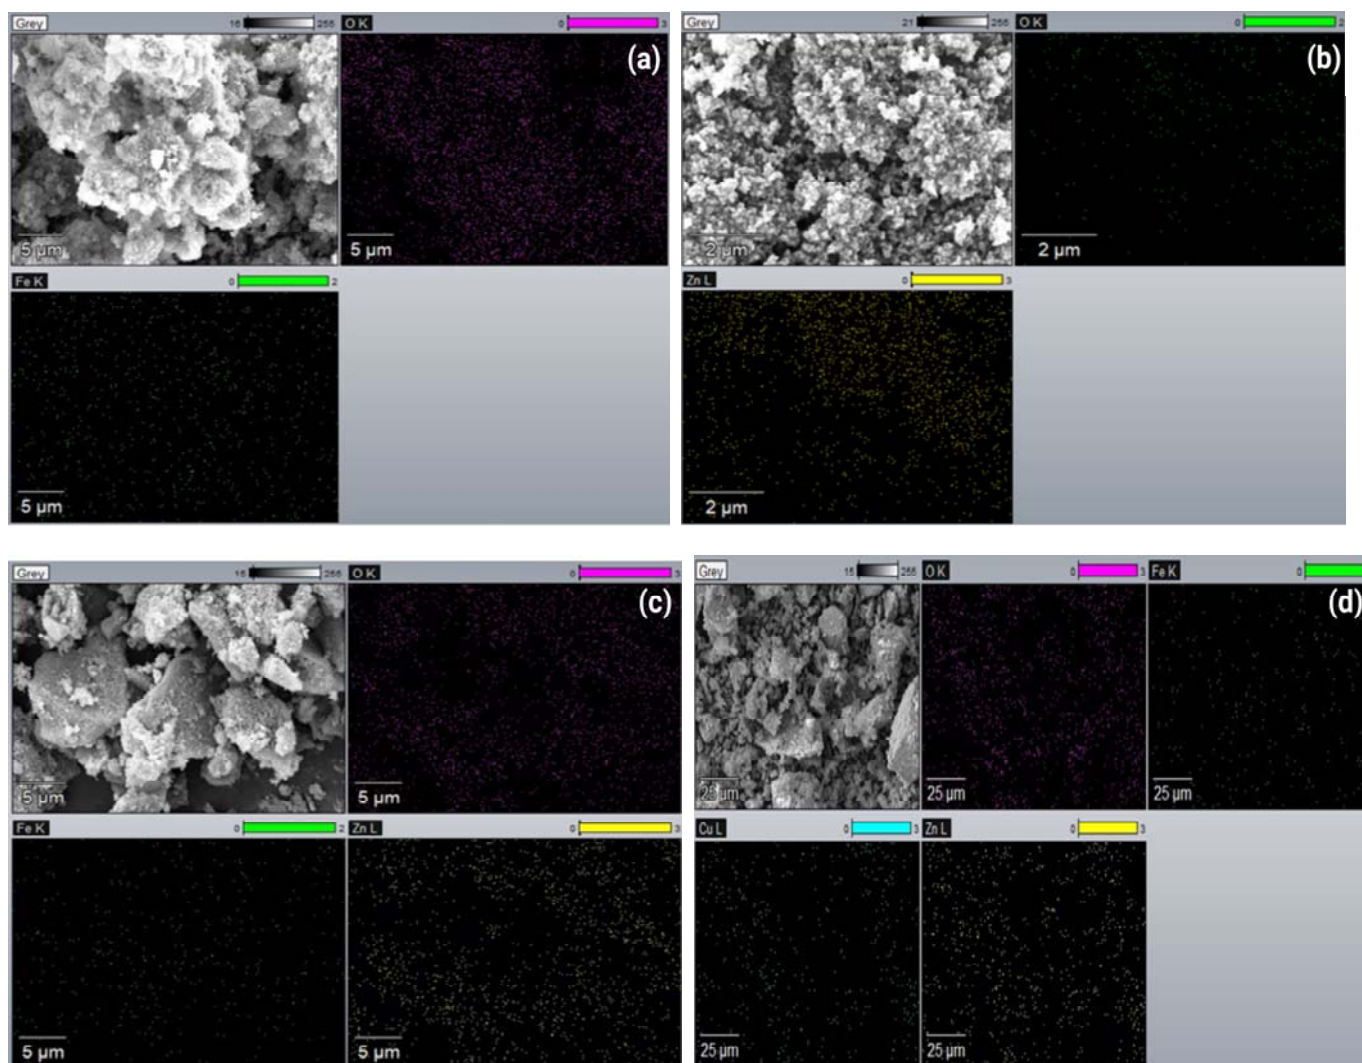

**Figure S1.** SEM-EDX elemental mapping analysis of (a)  $\text{Fe}_2\text{O}_3$ , (b)  $\text{ZnO}$ , (c)  $\text{ZnFe}_2\text{O}_4$ , and (d)  $\text{ZnFe}_2\text{O}_4\text{-Cu}$  NPs.

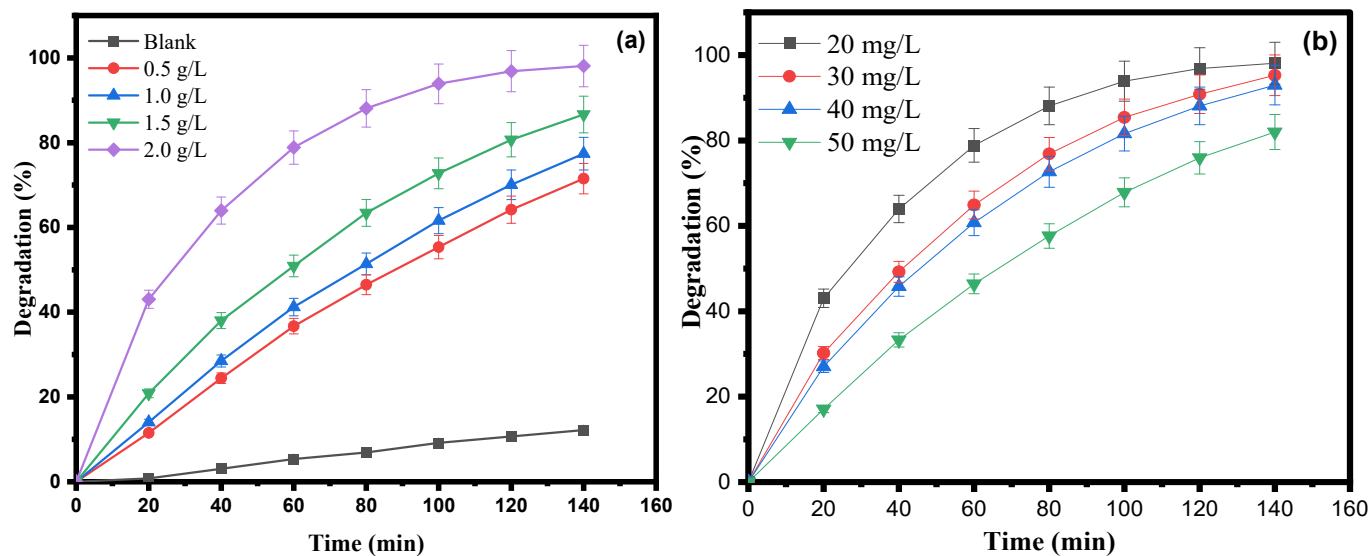

**Figure S2.** a) Photocatalytic degradation rate (%) of RhB dye with various catalyst dosages. (b) Photocatalytic degradation rate (%) of RhB dye with different dye concentrations.

**Table S1.** Langmuir–Hinshelwood kinetic rate constant of different parameters for RhB dye degradation.

| Parameters               |     | $k$ (min <sup>-1</sup> ) |
|--------------------------|-----|--------------------------|
| Catalyst dose (g/L)      | 0.0 | 0.00098                  |
|                          | 0.5 | 0.00897                  |
|                          | 1.0 | 0.01056                  |
|                          | 1.5 | 0.01423                  |
|                          | 2.0 | 0.02864                  |
| Dye concentration (mg/L) | 20  | 0.02864                  |
|                          | 30  | 0.02123                  |
|                          | 40  | 0.01861                  |
|                          | 50  | 0.01227                  |
